# Supplementary material for: Enrichr-KG: bridging enrichment analysis across multiple libraries
Source: PubMed Central journal article supplement — Nucleic Acids Res. 2023 May 11;51(W1):W168–79. doi: 10.1093/nar/gkad393 (PMC10320098; doi:10.1093/nar/gkad393), 2023-05-11
Supplement: gkad393_supplemental_file.pdf [file gkad393_supplemental_file.pdf]

# Supporting Online Materials

## **Enrichr-KG: Bridging Enrichment Analysis across Multiple Libraries**

John Erol Evangelista<sup>1</sup>, Zhuorui Xie<sup>1</sup>, Giacomo B. Marino<sup>1</sup>, Nhi Nguyen<sup>1</sup>, Daniel J. B. Clarke<sup>1</sup>,  
Avi Ma'ayan<sup>1,\*</sup>

<sup>1</sup>Department of Pharmacological Sciences, Mount Sinai Center for Bioinformatics, Icahn School of Medicine at Mount Sinai, New York, NY

\*To whom correspondence should be addressed:

E-mail: [avi.maayan@mssm.edu](mailto:avi.maayan@mssm.edu)

Tel: 001-212-281-1153

Fax: 001-212-849-2456

## Supporting Figures

Enrichr-KG Queries Submitted: 54616

Project Achilles human phenotype ontology MGI GENE ONTOLOGY Pfam ASCT+B BioGPS KEGG Wikidata SigCom LINCx ARCS4 reactome

GWAS Catalog TERUST CHEAS Tabula Sapiens Tabula Muris CCLE descartes DisGeNET FANTOM DISEASES

Submit your gene set for enrichment analysis with **Enrichr**

Paste a set of valid Entrez gene symbols (e.g. STAT3) on each row in the text-box

Submit Try an example

Select maximum of five libraries (Scroll for more)

- FANTOM6 IncRNA KD DEGs
- Jensen DISEASES
- Pfam Domains 2019
- ChEA 2022
- Tabula Sapiens
- GO Biological Process 2021
- CCLE Proteomics 2020
- Human Phenotype Ontology
- GWAS Catalog 2019

Top terms to include

5

Description

Minimum libraries per gene 1

Minimum links per gene 1

Minimum links per term 1

Subgraph size limit 100

Search an Enrichr term and expand it to a gene set:

Search Enrichr Term

**Fig. S1 The Enrichr-KG gene set enrichment analysis input form.** Gene IDs are automatically validated. Users can change the minimum libraries per gene, the minimum links per gene, the minimum links per term, and set the subgraph maximum size. In addition, users can select up to five gene set libraries to include in their analysis.

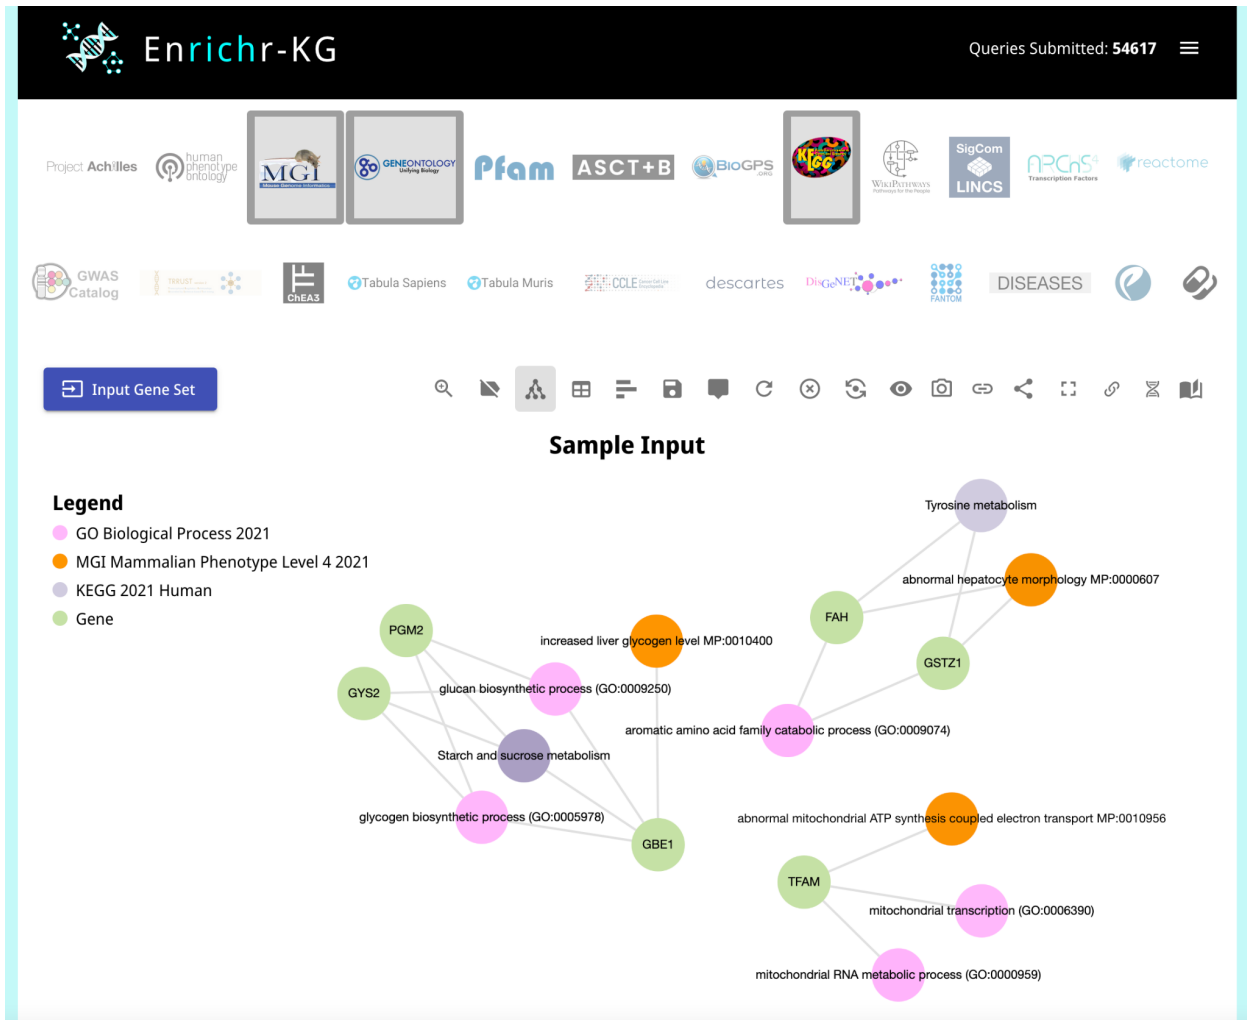

**Fig. S2 The Enrichr-KG gene set enrichment analysis subnetwork display.** Results from enrichment analysis queries are first returned as subnetworks that connect genes (green) to enriched terms (red - GO biological processes; blue - MGI phenotypes; orange - KEGG pathways).

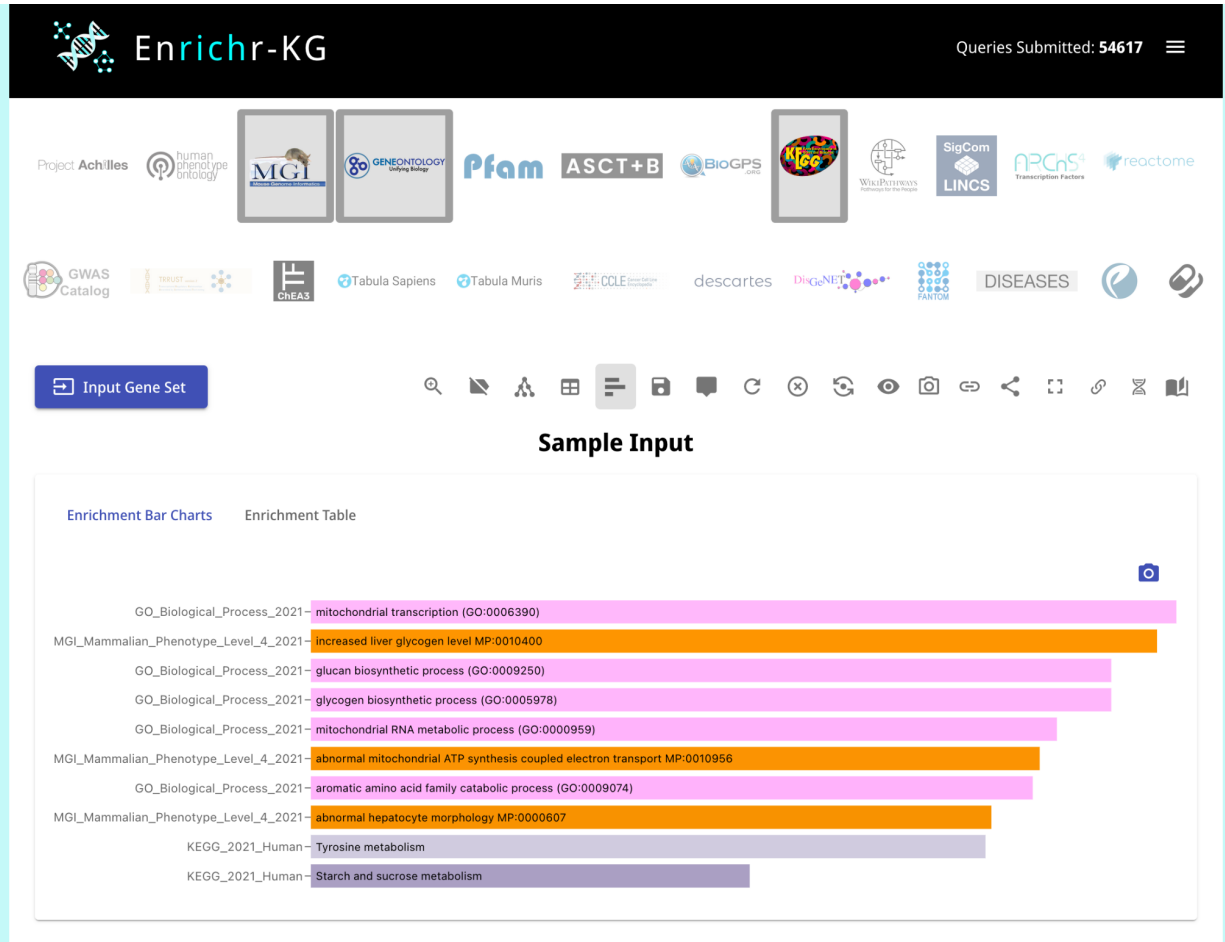

**Fig. S3 The Enrichr-KG gene set enrichment analysis bar chart visualization.** The enrichment results are visualized as a bar chart where the colors of the bars denote the source library. In this example, red bars represent GO biological processes; blue - MGI phenotypes; and orange - KEGG pathways. The size of the bars is proportional to the  $-\log(p\text{-value})$  of the enrichment score computed by the Fisher exact test.

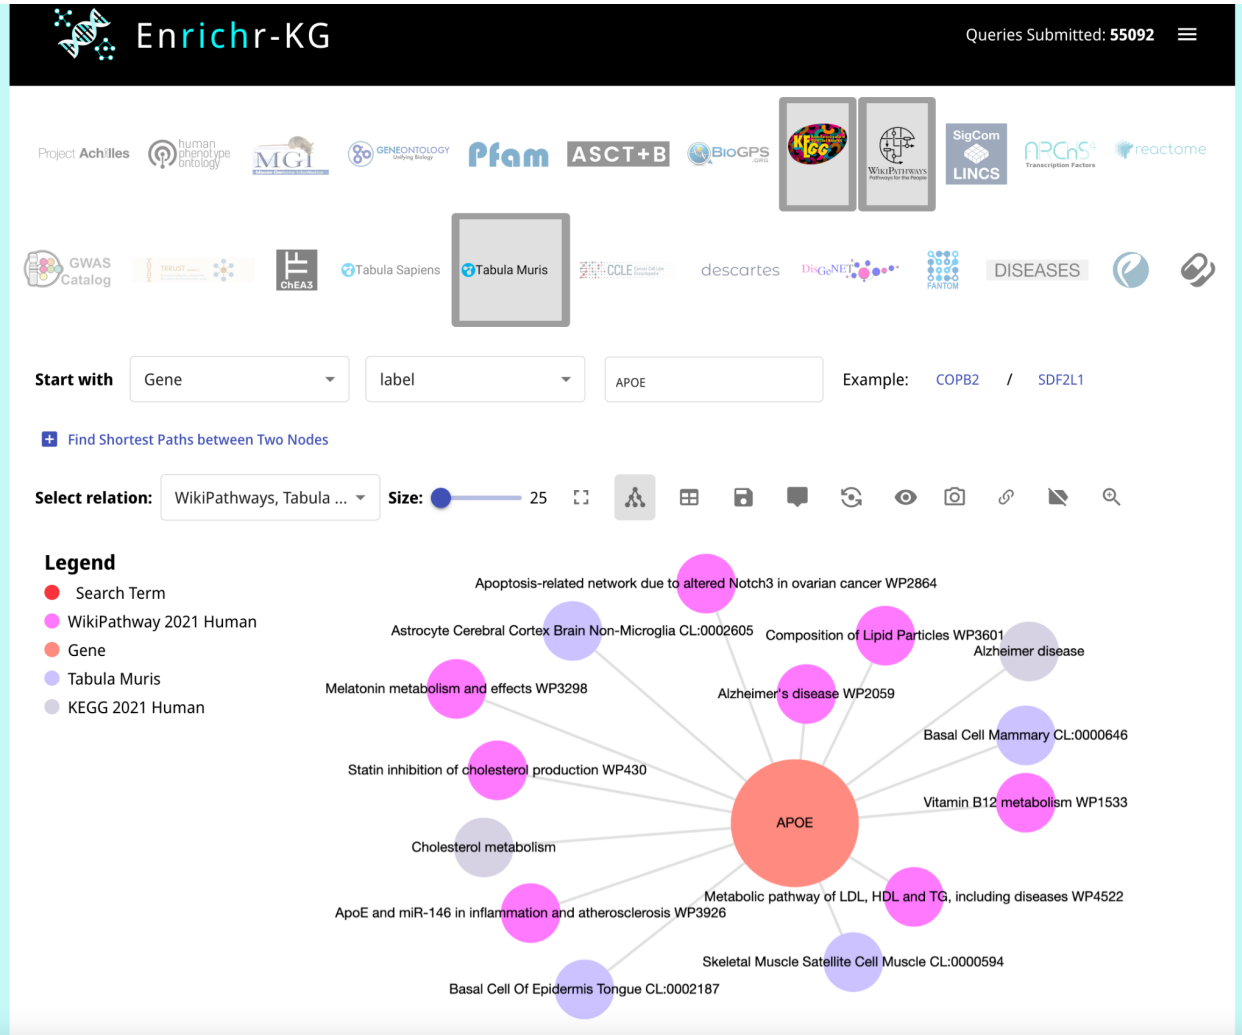

**Fig. S4** The Enrichr-KG visualization centered around a specific gene or a specific term. The example shows associations for the gene APOE in the KEGG, WikiPathways and Tabula Muris gene set libraries.
